# Supplementary material
Source: Springer Nature journal article supplement (https://www.springermedizin.de/resource/supplementary/12958_2012_987_MOESM6_ESM.pdf/9566568)

**A**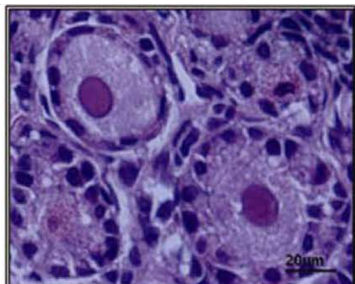**Blank control**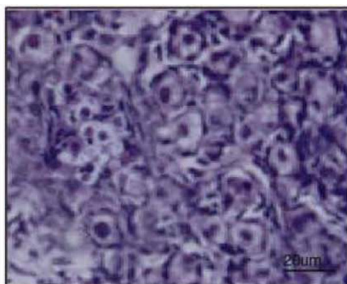**PD98059 group**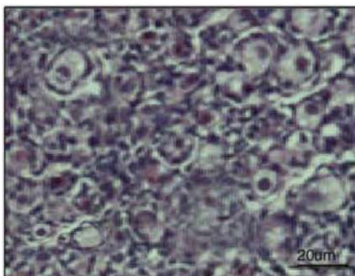**Calphostin group**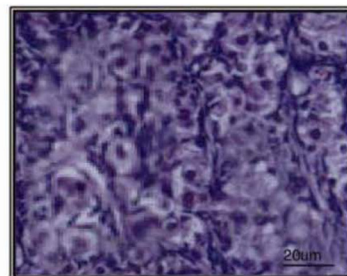**LY294002 group****B**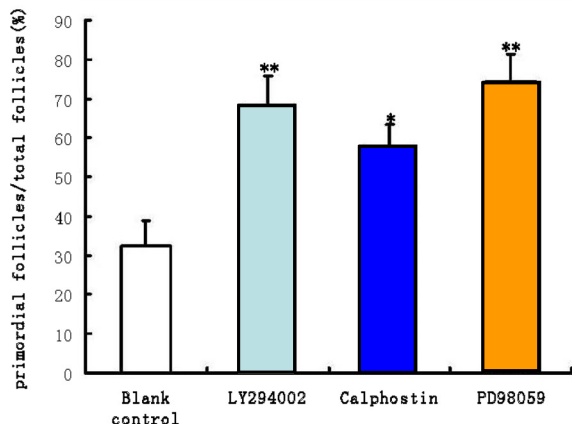

Supplement: MOESM6 [file 9566568]
